# Supplementary material for: Logicome Profiler: Exhaustive detection of statistically significant logic relationships from comparative omics data
Source: PubMed Central journal article supplement (PMC7194410; doi:10.1371/journal.pone.0232106), 2020-05-01
Supplement: pone.0232106.s001.pdf [file pone.0232106.s001.pdf]

## Supplementary Text

### Three conditions for all logic types used in Logicome Profiler

logic 1

- (a) C is associated with  $A \wedge B$
- (b') C is associated with  $A \wedge B$  rather than A
- (c') C is associated with  $A \wedge B$  rather than B

logic 2

- (a)  $\neg C$  is associated with  $A \wedge B$
- (b')  $\neg C$  is associated with  $A \wedge B$  rather than A
- (c')  $\neg C$  is associated with  $A \wedge B$  rather than B

logic 3

- (a)  $\neg C$  is associated with  $\neg A \wedge \neg B$
- (b')  $\neg C$  is associated with  $\neg A \wedge \neg B$  rather than  $\neg A$
- (c')  $\neg C$  is associated with  $\neg A \wedge \neg B$  rather than  $\neg A$

logic 4

- (a) C is associated with  $\neg(A \vee B) = \neg A \wedge \neg B$
- (b') C is associated with  $\neg A \wedge \neg B$  rather than  $\neg A$
- (c') C is associated with  $\neg A \wedge \neg B$  rather than  $\neg B$

logic 5

- (a) C is associated with  $A \wedge \neg B$
- (b') C is associated with  $A \wedge \neg B$  rather than A
- (c') C is associated with  $A \wedge \neg B$  rather than  $\neg B$

logic 6

- (a)  $\neg C$  is associated with  $A \wedge \neg B$
- (b')  $\neg C$  is associated with  $A \wedge \neg B$  rather than A
- (c')  $\neg C$  is associated with  $A \wedge \neg B$  rather than  $\neg B$
