# Supplementary material for: Logicome Profiler: Exhaustive detection of statistically significant logic relationships from comparative omics data
Source: PubMed Central journal article supplement (PMC7194410; doi:10.1371/journal.pone.0232106), 2020-05-01
Supplement: pone.0232106.s002.pdf [file pone.0232106.s002.pdf]

| A.                 |                |                     |                      |
|--------------------|----------------|---------------------|----------------------|
| (a)                | C              | $\neg C$            |                      |
| $A \wedge B$       | x              | y                   | $ A \wedge B $       |
| $\neg(A \wedge B)$ | z              | w                   | $ \neg(A \wedge B) $ |
|                    | $ C $          | $ \neg C $          | N                    |
| (b')               | C              | $\neg C$            |                      |
| $A \wedge B$       | x              | y                   | $ A \wedge B $       |
| $A \wedge \neg B$  | z              | w                   | $ A \wedge \neg B $  |
|                    | $ A \wedge C $ | $ A \wedge \neg C $ | A                    |
| (c')               | C              | $\neg C$            |                      |
| $A \wedge B$       | x              | y                   | $ A \wedge B $       |
| $\neg A \wedge B$  | z              | w                   | $ \neg A \wedge B $  |
|                    | $ B \wedge C $ | $ B \wedge \neg C $ | B                    |

  

| B.                 |                     |                |                      |
|--------------------|---------------------|----------------|----------------------|
| (a)                | $\neg C$            | C              |                      |
| $A \wedge B$       | x                   | y              | $ A \wedge B $       |
| $\neg(A \wedge B)$ | z                   | w              | $ \neg(A \wedge B) $ |
|                    | $ \neg C $          | C              | N                    |
| (b')               | $\neg C$            | C              |                      |
| $A \wedge B$       | x                   | y              | $ A \wedge B $       |
| $A \wedge \neg B$  | z                   | w              | $ A \wedge \neg B $  |
|                    | $ A \wedge \neg C $ | $ A \wedge C $ | A                    |
| (c')               | $\neg C$            | C              |                      |
| $A \wedge B$       | x                   | y              | $ A \wedge B $       |
| $\neg A \wedge B$  | z                   | w              | $ \neg A \wedge B $  |
|                    | $ B \wedge \neg C $ | $ B \wedge C $ | B                    |

  

| C.                     |                          |                     |                          |
|------------------------|--------------------------|---------------------|--------------------------|
| (a)                    | $\neg C$                 | C                   |                          |
| $\neg A \wedge \neg B$ | x                        | y                   | $ \neg A \wedge \neg B $ |
| $A \vee B$             | z                        | w                   | $ A \vee B $             |
|                        | $ \neg C $               | C                   | N                        |
| (b')                   | $\neg C$                 | C                   |                          |
| $\neg A \wedge \neg B$ | x                        | y                   | $ \neg A \wedge \neg B $ |
| $\neg A \wedge B$      | z                        | w                   | $ \neg A \wedge B $      |
|                        | $ \neg A \wedge \neg C $ | $ \neg A \wedge C $ | $ \neg A $               |
| (c')                   | $\neg C$                 | C                   |                          |
| $\neg A \wedge \neg B$ | x                        | y                   | $ \neg A \wedge \neg B $ |
| $A \wedge \neg B$      | z                        | w                   | $ A \wedge \neg B $      |
|                        | $ \neg B \wedge \neg C $ | $ \neg B \wedge C $ | $ \neg B $               |

  

| D.                     |                     |                          |                          |
|------------------------|---------------------|--------------------------|--------------------------|
| (a)                    | C                   | $\neg C$                 |                          |
| $\neg A \wedge \neg B$ | x                   | y                        | $ \neg A \wedge \neg B $ |
| $A \vee B$             | z                   | w                        | $ A \vee B $             |
|                        | C                   | $ \neg C $               | N                        |
| (b')                   | C                   | $\neg C$                 |                          |
| $\neg A \wedge \neg B$ | x                   | y                        | $ \neg A \wedge \neg B $ |
| $\neg A \wedge B$      | z                   | w                        | $ \neg A \wedge B $      |
|                        | $ \neg A \wedge C $ | $ \neg A \wedge \neg C $ | $ \neg A $               |
| (c')                   | C                   | $\neg C$                 |                          |
| $\neg A \wedge \neg B$ | x                   | y                        | $ \neg A \wedge \neg B $ |
| $A \wedge \neg B$      | z                   | w                        | $ A \wedge \neg B $      |
|                        | $ \neg B \wedge C $ | $ \neg B \wedge \neg C $ | $ \neg B $               |

  

| E.                      |                     |                          |                           |
|-------------------------|---------------------|--------------------------|---------------------------|
| (a)                     | C                   | $\neg C$                 |                           |
| $A \wedge \neg B$       | x                   | y                        | $ A \wedge \neg B $       |
| $\neg(A \wedge \neg B)$ | z                   | w                        | $ \neg(A \wedge \neg B) $ |
|                         | C                   | $ \neg C $               | N                         |
| (b')                    | C                   | $\neg C$                 |                           |
| $A \wedge \neg B$       | x                   | y                        | $ A \wedge \neg B $       |
| $A \wedge B$            | z                   | w                        | $ A \wedge B $            |
|                         | $ A \wedge C $      | $ A \wedge \neg C $      | A                         |
| (c')                    | C                   | $\neg C$                 |                           |
| $A \wedge \neg B$       | x                   | y                        | $ A \wedge \neg B $       |
| $\neg A \wedge \neg B$  | z                   | w                        | $ \neg A \wedge \neg B $  |
|                         | $ \neg B \wedge C $ | $ \neg B \wedge \neg C $ | $ \neg B $                |

  

| F.                      |                          |                     |                           |
|-------------------------|--------------------------|---------------------|---------------------------|
| (a)                     | $\neg C$                 | C                   |                           |
| $A \wedge \neg B$       | x                        | y                   | $ A \wedge \neg B $       |
| $\neg(A \wedge \neg B)$ | z                        | w                   | $ \neg(A \wedge \neg B) $ |
|                         | C                        | $ \neg C $          | N                         |
| (b')                    | $\neg C$                 | C                   |                           |
| $A \wedge \neg B$       | x                        | y                   | $ A \wedge \neg B $       |
| $A \wedge B$            | z                        | w                   | $ A \wedge B $            |
|                         | $ A \wedge \neg C $      | $ A \wedge C $      | A                         |
| (c')                    | $\neg C$                 | C                   |                           |
| $A \wedge \neg B$       | x                        | y                   | $ A \wedge \neg B $       |
| $\neg A \wedge \neg B$  | z                        | w                   | $ \neg A \wedge \neg B $  |
|                         | $ \neg B \wedge \neg C $ | $ \neg B \wedge C $ | $ \neg B $                |

Fig. S1 The contingency tables for the hypothesis tests of (A) logic 1,  $C = A \wedge B$ , (B), logic 2,  $C = \neg(A \wedge B)$ , (C) logic 3,  $C = A \vee B$ , (D) logic 4,  $C = \neg(A \vee B)$ , (E) logic 5,  $C = A \wedge \neg B$  and (F) logic 6,  $C = \neg A \vee B$ .
