# Supplementary material for: Logicome Profiler: Exhaustive detection of statistically significant logic relationships from comparative omics data
Source: PubMed Central journal article supplement (PMC7194410; doi:10.1371/journal.pone.0232106), 2020-05-01
Supplement: pone.0232106.s005.pdf [file pone.0232106.s005.pdf]

Table S1 Dependence of the number of detections on the number of samples for each method

| Sample size | Method  |                   |                            |
|-------------|---------|-------------------|----------------------------|
|             | LAPP    | Bonferroni method | Benjamini-Yekutieli method |
| 40          | 14214.3 | 0.0               | 0.0                        |
| 50          | 4912.9  | 0.0               | 12.2                       |
| 60          | 2560.7  | 0.1               | 456.3                      |
| 70          | 1524.9  | 6.1               | 3655.3                     |
| 80          | 1159.1  | 32.0              | 13215.6                    |
| 90          | 707.2   | 91.0              | 30956.3                    |
| 105         | 551     | 610               | 94855                      |
