# Supplementary material for: Logicome Profiler: Exhaustive detection of statistically significant logic relationships from comparative omics data
Source: PubMed Central journal article supplement (PMC7194410; doi:10.1371/journal.pone.0232106), 2020-05-01
Supplement: pone.0232106.s006.pdf [file pone.0232106.s006.pdf]

Table S2 The list of frequently occurred genes in the detected logic relationships in the eggNOG ortholog dataset

| COG/NOG ID | Description                                | Frequency |
|------------|--------------------------------------------|-----------|
| COG1661    | Predicted DNA-binding protein              | 6137      |
| COG1836    | Predicted membrane protein                 | 5359      |
| COG2771    | DNA-binding HTH domain-containing proteins | 4508      |
| COG4333    | Uncharacterized protein                    | 3591      |
| NOG277419  | -                                          | 2826      |
| NOG40089   | -                                          | 2429      |
| COG0727    | Predicted Fe-S-cluster oxidoreductase      | 2242      |
| NOG119063  | -                                          | 2239      |
| COG3823    | Glutamine cyclotransferase                 | 2162      |
| COG1876    | D-alanyl-D-alanine carboxypeptidase        | 2076      |

“-” means that the database had no annotation for the ortholog groups.
